# Supplementary material for: Site-specific integration in CHO cells mediated by CRISPR/Cas9 and homology-directed DNA repair pathway
Source: PubMed Central journal article supplement (PMC4339809; doi:10.1038/srep08572), 2015-02-25
Supplement: srep08572-s1.pdf [file srep08572-s1.pdf]

## Supplementary Information

### Site Specific Integration in CHO Cells Mediated by CRISPR/Cas9 and Homology-Directed DNA Repair Pathway

Jae Seong Lee, Thomas Beuchert Kallehauge, Lasse Ebdrup Pedersen, and Helene Fastrup Kildegaard\*

The Novo Nordisk Foundation Center for Biosustainability, Technical University of Denmark, 2970 Hørsholm, Denmark

\* To whom correspondence should be addressed. Tel: + 45 20 12 46 29; Fax: + 45 45 25 80 01; Email: [hef@biosustain.dtu.dk](mailto:hef@biosustain.dtu.dk)

| <b>Section, figures and tables</b> | <b>Page number</b> |
|------------------------------------|--------------------|
| Supplementary Figure 1             | 2                  |
| Supplementary Figure 2             | 3                  |
| Supplementary Figure 3             | 4                  |
| Supplementary Figure 4             | 5                  |
| Supplementary Figure 5             | 6                  |
| Supplementary Figure 6             | 7                  |
| Supplementary Figure 7             | 8                  |
| Supplementary Figure 8             | 9                  |
| Supplementary Figure 9             | 10                 |
| Supplementary Table 1              | 11                 |
| Supplementary Table 2              | 11                 |
| Supplementary Table 3              | 15                 |

Figures

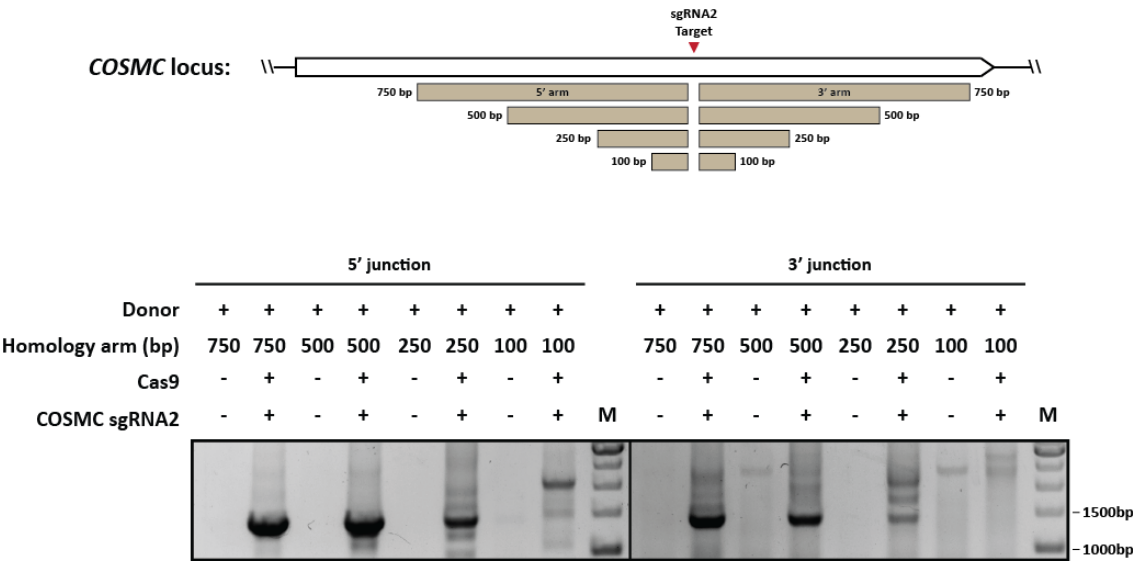

**Supplementary Figure 1. Effect of the length of homology arms on targeted integration.** Donor plasmids containing different length of 5' and 3' homology arms flanking *COSMC* sgRNA2 target site were designed. Genomic DNA extracted from stable pool of cells transfected with Cas9, sgRNA2, and each donor plasmid was used for 5'/3' junction PCR to investigate target specific knock-in.

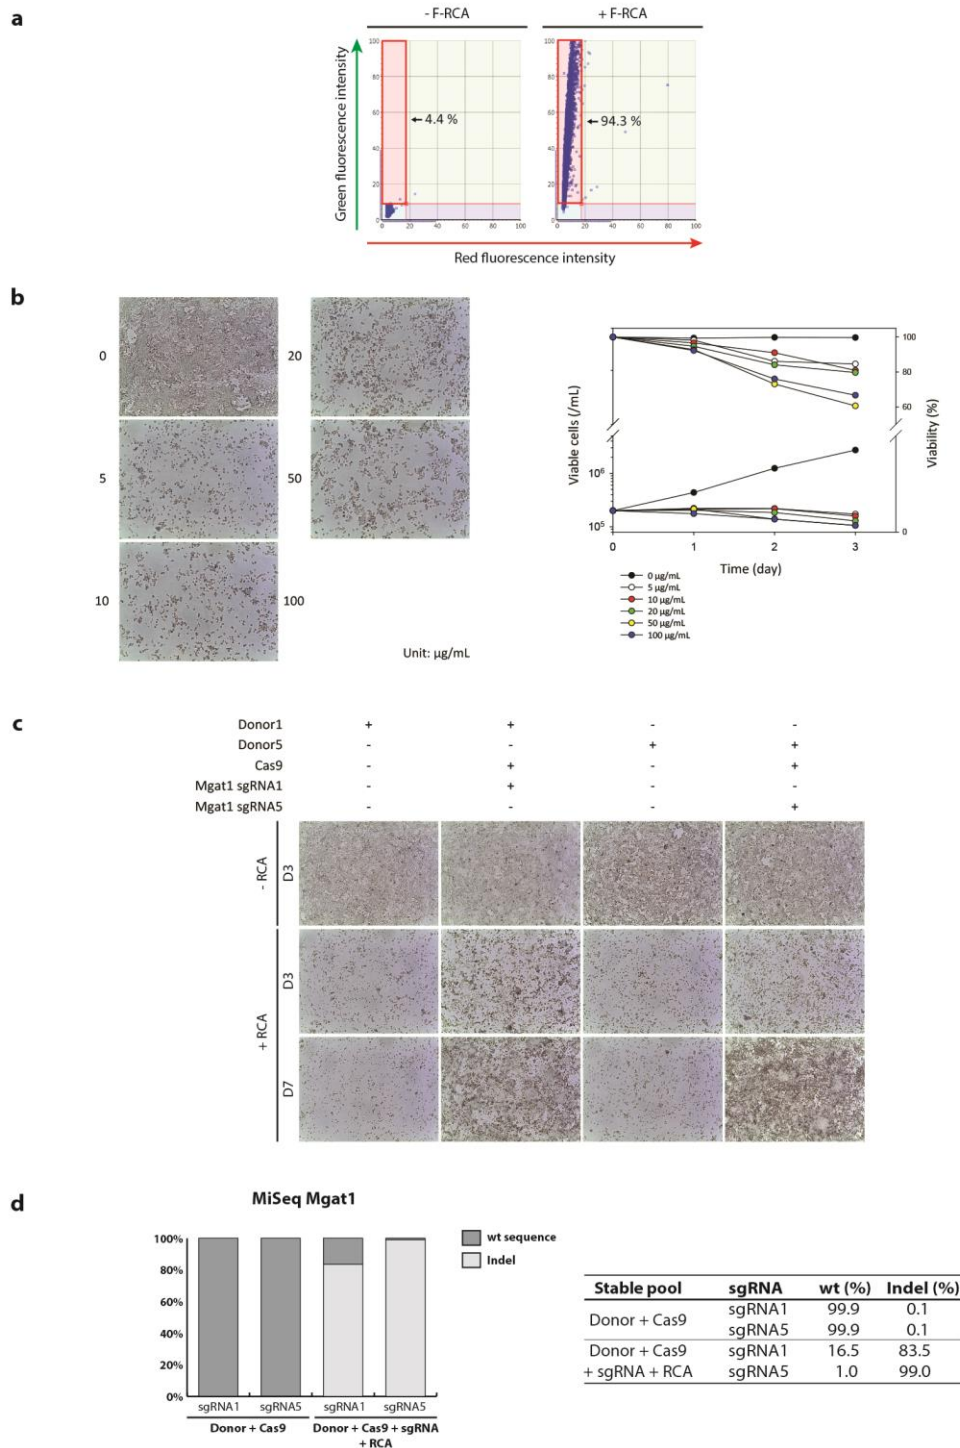

**Supplementary Figure 2. RCA-I sensitivity analysis on wild type CHO-S cells and *Mgat1* knockout cells.** (a) F-RCA staining of CHO-S cells, followed by quantification based on green fluorescent levels. (b) Effect of RCA-I treatment on CHO-S cells with regard to cell growth and viability. CHO-S cells were cultivated in the presence of various concentrations of RCA-I. Viable cell concentration and viability was subsequently measured on a daily basis, and representative microscopy images were acquired on day 3 (left). (c) Acquisition of RCA-I resistance occurred by CRISPR/Cas9 activity for the *Mgat1* locus. Stable pool of cells transfected with Cas9, sgRNA, and donor plasmid targeting *Mgat1* locus formed confluent in the presence of RCA-I. (d) Knockout of *Mgat1* locus in RCA-I resistant cells was confirmed by deep sequencing analysis of the *Mgat1* locus.

**a**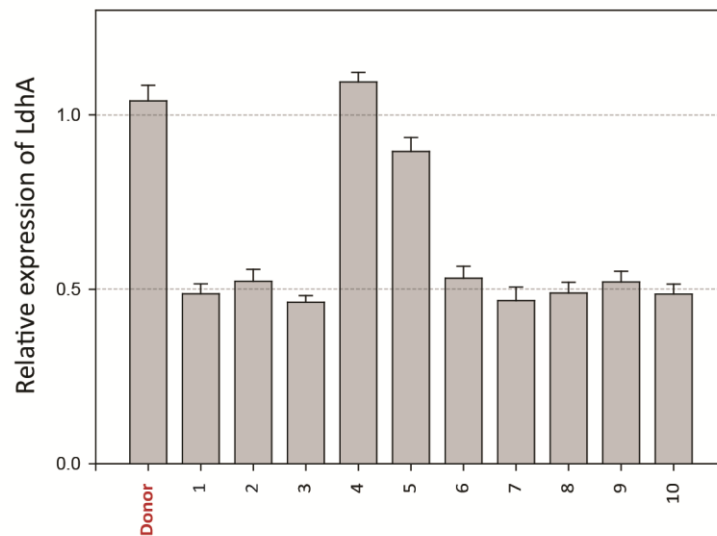**b**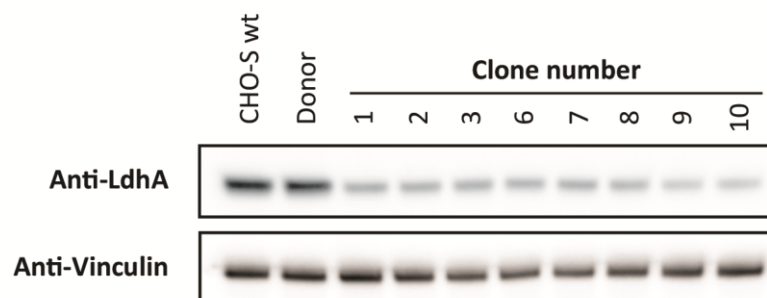

**Supplementary Figure 3. Comparison of the relative LdhA expression level in *LdhA* targeted clonal cells.** (a) Analysis of LdhA mRNA. Total RNAs from each individual clone were isolated using TRIzol® Reagent (Life Technologies), followed by DNase treatment to remove contaminating DNA (TURBO DNA-free™ DNase Treatment and Removal Reagents, Life Technologies). cDNAs were synthesized from 1 µg of total RNAs using Maxima First Strand cDNA Synthesis Kit for RT-qPCR (Thermo Fisher Scientific). For each cDNA sample, the qRT-PCR was performed to quantify LdhA mRNA levels. All samples were normalized for the beta-actin (ACTB) level. The control used to estimate the relative expressions was the mRNA expression in CHO-S wild type cells, which was set at 1.0. Average values from three independent experiments ± SD are shown. (b) Analysis of LdhA protein. Cells were lysed in a fresh lysis buffer (10 mM Tris-HCl, pH 7.4, 100 mM NaCl, 2.5 mM MgCl<sub>2</sub>, 0.5% Triton X-100, supplemented with 1x Roche protease inhibitor cocktail). 10 µg of protein was separated on 4-12% Bis-Tris NuPAGE® gel (Life Technologies), followed by transfer to nitrocellulose membranes. Blots were probed with anti-LdhA (Cell Signaling Technology, Danvers, MA) or anti-Vinculin (Sigma-Aldrich; loading control) antibodies, and bands were then visualized using Amersham ECL Prime Western Blotting Detection Reagent (GE Healthcare Life Sciences, Buckinghamshire, UK).

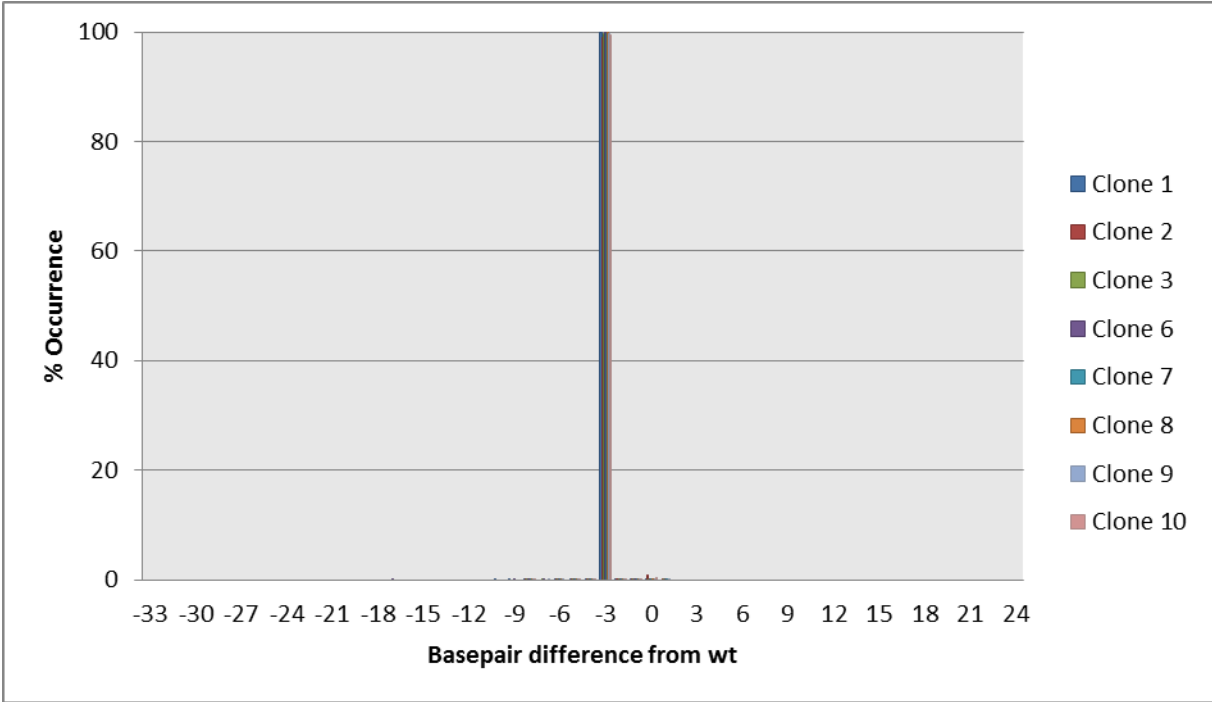

**Supplementary Figure 4. Frequency distribution of indel sizes at the *LdhA* locus in *LdhA* targeted clonal cells.** The regions spanning the integration site at the *LdhA* locus, sgRNA2 target site, were subjected to deep sequencing analysis using Miseq. The size distribution of indels ranging from -33 bp (33 bp deletion) to 24 bp (24 bp insertion) is shown.

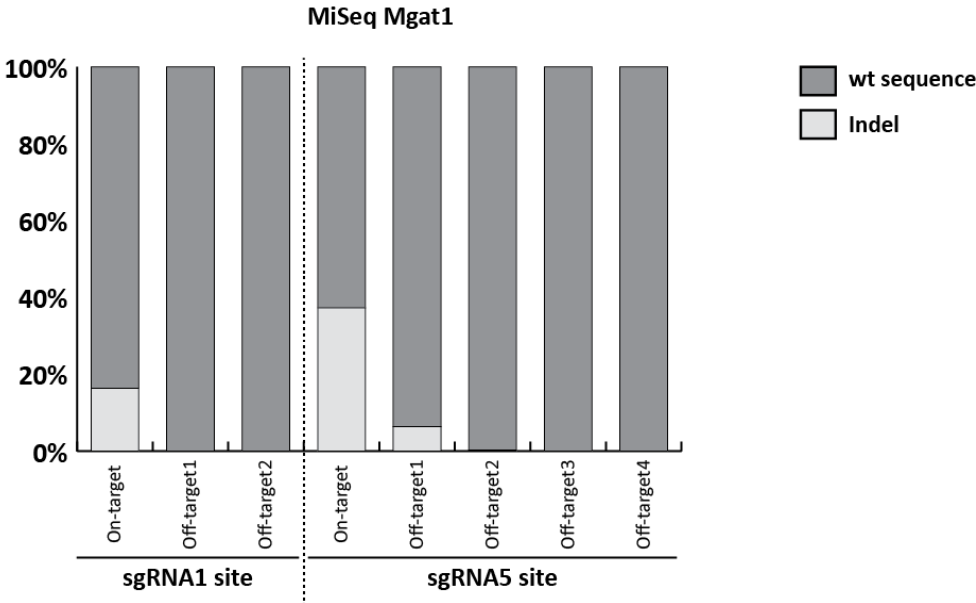

**Supplementary Figure 5. Indel frequencies at *Mgat1* on-target sites and off-target sites before RCA-I enrichment.** Genomic DNA was extracted from two stable pool of cells transfected with Cas9, sgRNA, and donor plasmids, one for each sgRNA (sgRNA1 or sgRNA5). PCR amplicons, which span the *Mgat1* on-target sites and potential off-target sites as described in Fig. 4B and 5C, were subjected to deep sequencing analysis using Miseq.

**a** *COSMC*

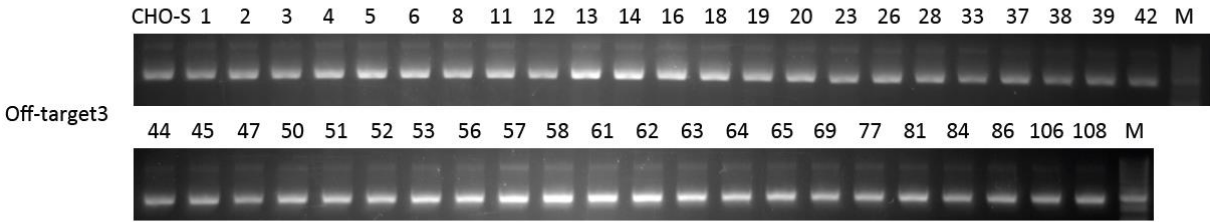

**b** *Mgat1* sgRNA5 site

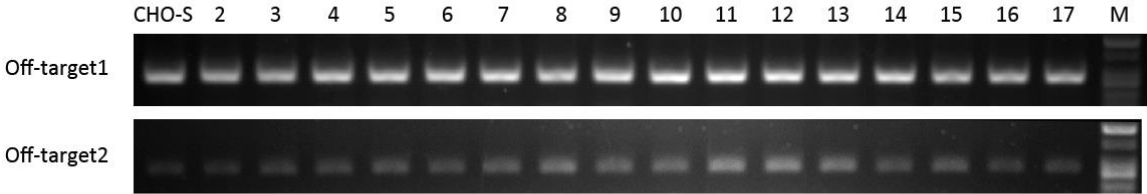

**c** *LdhA*

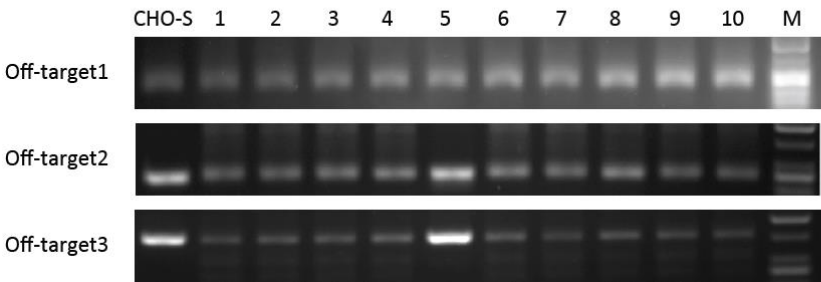

**Supplementary Figure 6. PCR amplification of potential off-target sites.** PCR was performed on genomic DNAs of each individual clone that were used for off-target analysis. PCR amplicons spanning off-target sites at any measurable frequency were generated, and amplicon size was compared with that from CHO-S wild type cells.

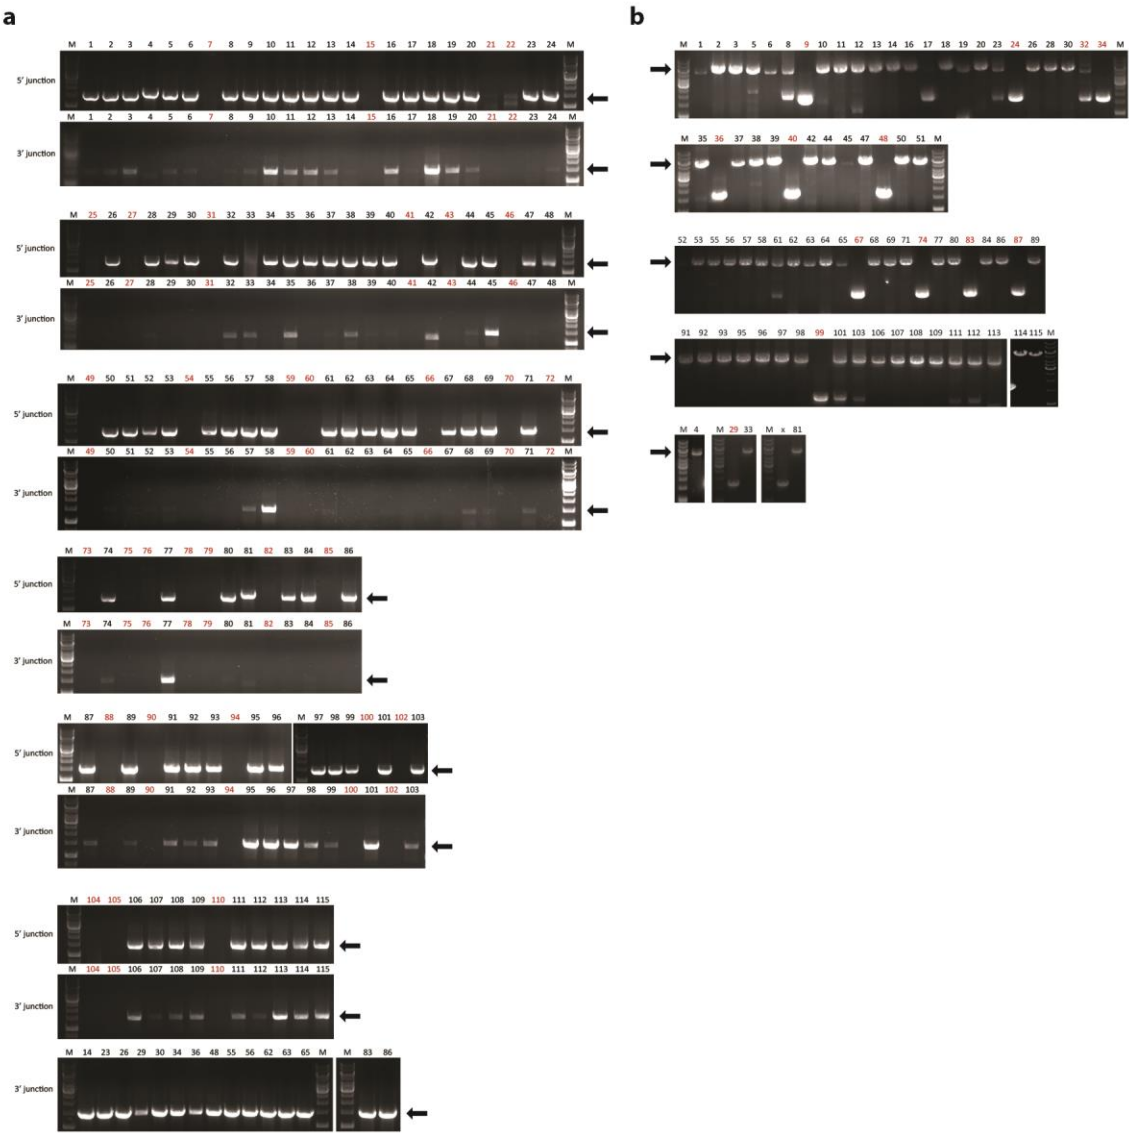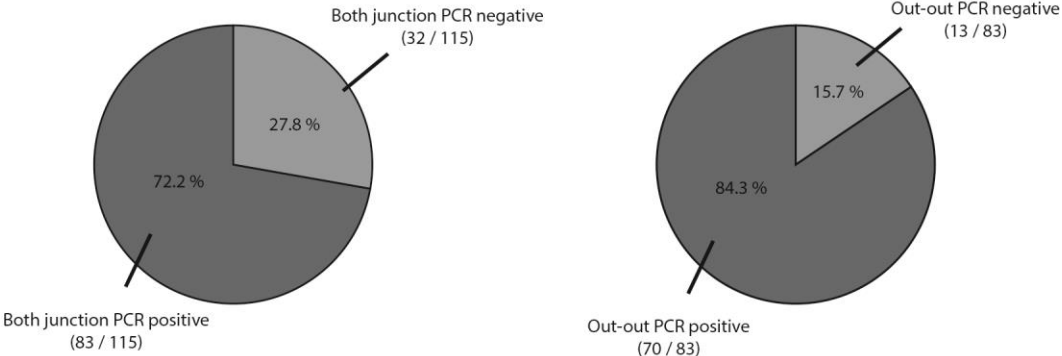

**Supplementary Figure 7. Selection of targeted integrants at the *COSMC* locus.** (a) 5'/3' junction PCR was performed on genomic extract from 115 clones. 83 of the clones (72.2%) were both junction PCR positive, which were further analyzed by (b) out-out PCR. Expected size of amplicons were indicated by arrows. Numerals indicated the number of each clone.



The number of PCR negative clones was shown in red. M, 1 kb DNA ladder. (bottom) Pie charts displaying the contribution of PCR positive and negative clones to a total.

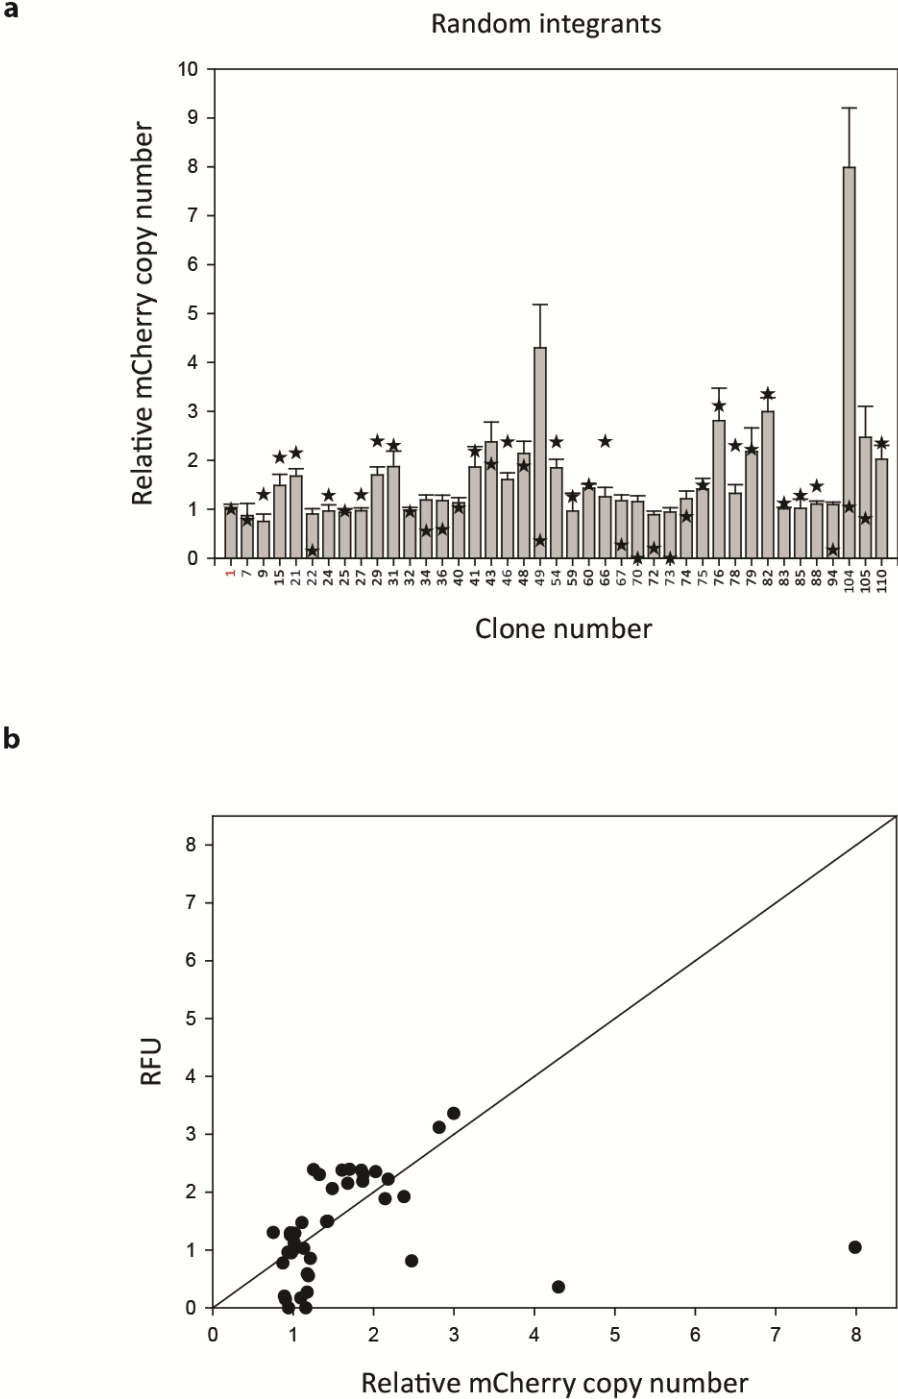

**Supplementary Figure 8. Relationship between the relative copy number of mCherry regions and the expression level of mCherry (RFU) in random integrants.** (a) (Gray bar) relative mCherry copy number; (black star) RFU. Each measured value was normalized by that of the targeted integrant clone number 1 (*COSMC* locus; shown in red). (b) Scatter plot of RFU versus relative mCherry copy number. A diagonal line indicates a one to one correlation.

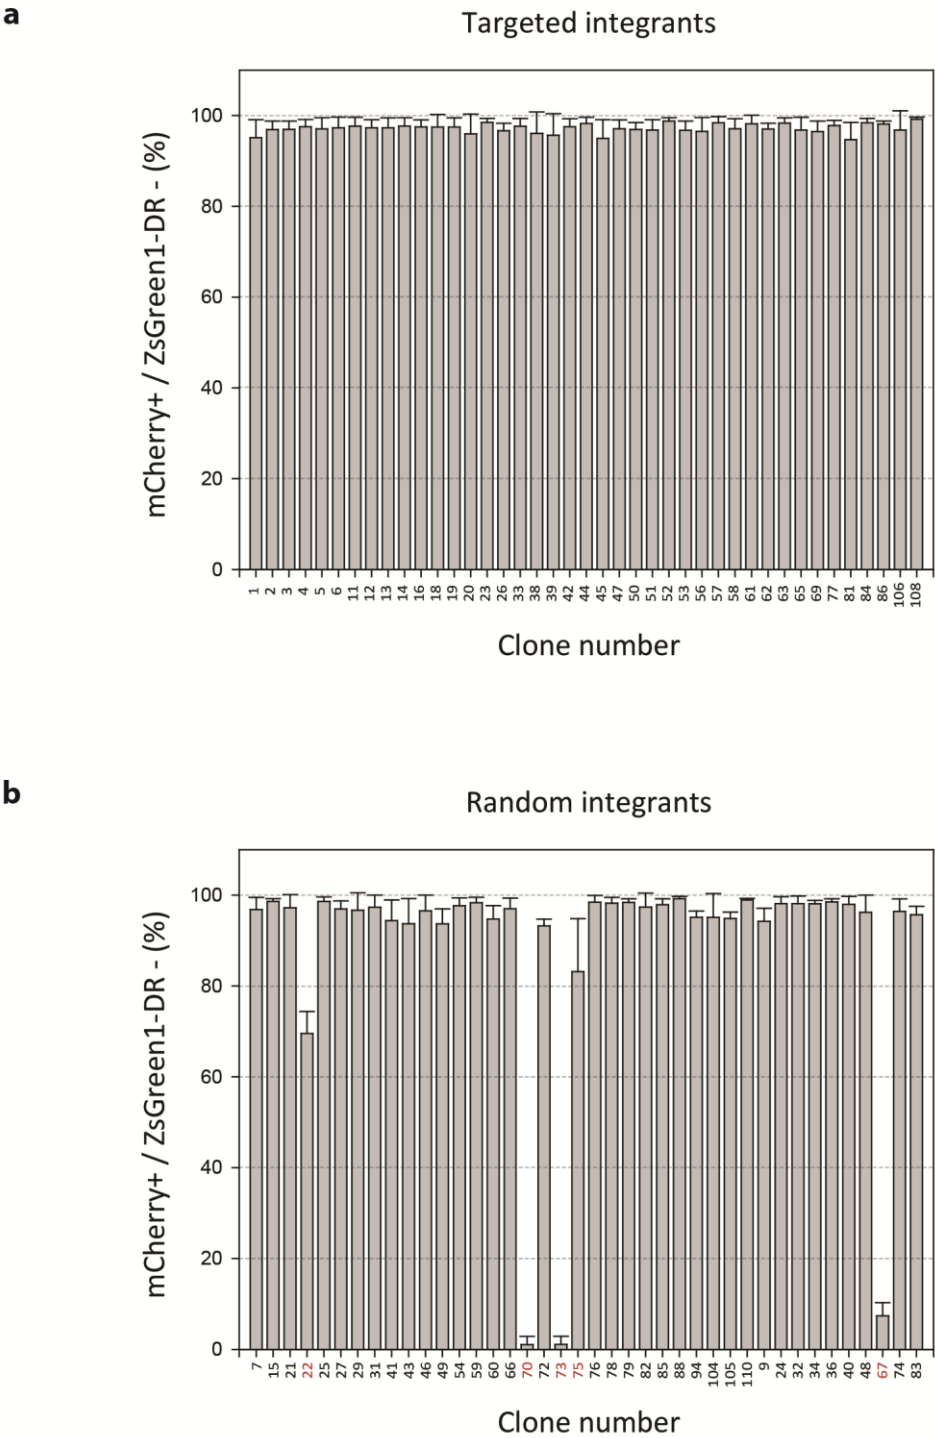

**Supplementary Figure 9. Percentage of mCherry positive/ZsGreen1-DR negative cells in individual clone.** mCherry positive/ZsGreen1-DR negative clonal cells in the population of either (a) targeted integrants (*COSMC* locus) or (b) random integrants were expanded prior to batch cultures and subsequently inoculated for batch cultures. On day 3, the percentage of mCherry positive/ZsGreen1-DR negative cells was measured by imaging cell cytometer. Clones with a decreased percentage were shown in red. The error bars represent the standard deviations calculated from the data obtained in triplicate experiments.

**Tables****Supplementary Table 1.** sgRNA genomic target sequences

| Target gene | sgRNA name | GNNNNNNNNNNNNNNNNNNNNNNNGG | Ref.                |
|-------------|------------|----------------------------|---------------------|
| COSMC       | sgRNA2_C   | GAATATGTGAGTGTGGATGGAGG    | Ronda et al. (2014) |
| MGAT1       | sgRNA1     | GCTCACACCCTTACGGCCAAAGG    | In this study       |
|             | sgRNA2     | GGACACGTCGACCCCTGAACTGG    | In this study       |
|             | sgRNA3     | GAGGGGGTTCGCAGGCACACGGGG   | In this study       |
|             | sgRNA4     | GGGACACAGCGATGTTACTCAGG    | In this study       |
|             | sgRNA5     | GTGGAGTTGGAGCGGCAGCGGGG    | In this study       |
| LDHA        | sgRNA1     | GAACAAGATTACGATTGTTGGGG    | In this study       |
|             | sgRNA2     | GCTGGGCACTGATACCGACAAGG    | In this study       |
|             | sgRNA3     | GGACTGTATTTTACAACGTTGGG    | In this study       |
|             | sgRNA4     | GCTCGATTCCGTTATCTGATGGG    | In this study       |
|             | sgRNA5     | GCTGTCATGGATGGGTCTTAGGG    | In this study       |

**Supplementary Table 2.** Primer sequences

| Primer name                     | Purpose                          | Sequence (5'-3')                                            |
|---------------------------------|----------------------------------|-------------------------------------------------------------|
| <b>sgRNA expression plasmid</b> |                                  |                                                             |
| Mgat1_sgRNA1_fwd                | Sense oligo for Mgat1_sgRNA1     | GGAAAGGACGAAACACCGCTCACACCCTTACG<br>GCCAAGTTTTAGAGCTAGAAAT  |
| Mgat1_sgRNA1_rev                | Antisense Oligo for Mgat1_sgRNA1 | CTAAAACCTGGCCGTAAGGGTGTGAGCGGTGTT<br>TCGTCCTTTCCACAAGATAT   |
| Mgat1_sgRNA2_fwd                | Sense oligo for Mgat1_sgRNA2     | GGAAAGGACGAAACACCGGACACGTCGACCCC<br>TGAACGTTTTAGAGCTAGAAAT  |
| Mgat1_sgRNA2_rev                | Antisense Oligo for Mgat1_sgRNA2 | CTAAAACGTTTCAGGGGTCGACGTGTCGGGTGTT<br>TCGTCCTTTCCACAAGATAT  |
| Mgat1_sgRNA3_fwd                | Sense oligo for Mgat1_sgRNA3     | GGAAAGGACGAAACACCGAGGGGGTTCGCAGG<br>CACACGGTTTTAGAGCTAGAAAT |
| Mgat1_sgRNA3_rev                | Antisense Oligo for Mgat1_sgRNA3 | CTAAAACCGTGTGCCTGCGACCCCTCGGTGTT<br>TCGTCCTTTCCACAAGATAT    |
| Mgat1_sgRNA4_fwd                | Sense oligo for Mgat1_sgRNA4     | GGAAAGGACGAAACACCGGGGCACAGCGATGT<br>TACTCGTTTTAGAGCTAGAAAT  |
| Mgat1_sgRNA4_rev                | Antisense Oligo for Mgat1_sgRNA4 | CTAAAACGAGTAACATCGCTGTGCCCCGGGTGTT<br>TCGTCCTTTCCACAAGATAT  |
| Mgat1_sgRNA5_fwd                | Sense oligo for Mgat1_sgRNA5     | GGAAAGGACGAAACACCGTGGAGTTGGAGCG<br>GCAGCGTTTTAGAGCTAGAAAT   |
| Mgat1_sgRNA5_rev                | Antisense Oligo for Mgat1_sgRNA5 | CTAAAACCGCTGCCGCTCCAACCTCCACGGTGT<br>CGTCCTTTCCACAAGATAT    |
| LdhA_sgRNA1_fwd                 | Sense oligo for LdhA_sgRNA1      | GGAAAGGACGAAACACCGAACAAGATTACGAT<br>TGTTGGTTTTAGAGCTAGAAAT  |
| LdhA_sgRNA1_rev                 | Antisense Oligo for LdhA_sgRNA1  | CTAAAACCAACAATCGTAATCTTGTTCGGGTGTT<br>CGTCCTTTCCACAAGATAT   |
| LdhA_sgRNA2_fwd                 | Sense oligo for Mgat1_sgRNA2     | GGAAAGGACGAAACACCGCTGGGCACTGATAC<br>CGACAGTTTTAGAGCTAGAAAT  |
| LdhA_sgRNA2_rev                 | Antisense Oligo for LdhA_sgRNA2  | CTAAAACGTGCGGTATCAGTGCCCAGCGGTGTT<br>TCGTCCTTTCCACAAGATAT   |
| LdhA_sgRNA3_fwd                 | Sense oligo for LdhA_sgRNA3      | GGAAAGGACGAAACACCGGACTGATTTTACA<br>ACGTTGTTTTAGAGCTAGAAAT   |
| LdhA_sgRNA3_rev                 | Antisense Oligo for LdhA_sgRNA3  | CTAAAACAACGTTGTGAAATACAGTCCGGGTGTT                          |

## Supplementary Information

## Targeted DNA integration platform in CHO cells

|                         |                                                        |                                                            |
|-------------------------|--------------------------------------------------------|------------------------------------------------------------|
|                         |                                                        | TCGTCCTTTCCACAAGATAT                                       |
| LdhA_sgRNA4_fwd         | Sense oligo for LdhA_sgRNA4                            | GGAAAGGACGAAACACCGCTCGATTCCGTTATC<br>TGATGTTTTAGAGCTAGAAAT |
| LdhA_sgRNA4_rev         | Antisense Oligo for LdhA_sgRNA4                        | CTAAAACATCAGATAACGGAATCGAGCGGTGTT<br>TCGTCCTTTCCACAAGATAT  |
| LdhA_sgRNA5_fwd         | Sense oligo for LdhA_sgRNA5                            | GGAAAGGACGAAACACCGCTGTCATGGATGGG<br>TCCTAGTTTTAGAGCTAGAAAT |
| LdhA_sgRNA5_rev         | Antisense Oligo for LdhA_sgRNA5                        | CTAAAACATAGGACCCATCCATGACAGCGGTGTT<br>TCGTCCTTTCCACAAGATAT |
| <b>Donor plasmid</b>    |                                                        |                                                            |
| COSMC 5' arm_fwd        | USER PCR primer for COSMC donor plasmid (Homology arm) | AGTCGGTGUGTAATCCATGGAGGAGTTTCT                             |
| COSMC 5' arm_rev        | USER PCR primer for COSMC donor plasmid (Homology arm) | ACGCTGCTUAAGGTCTCCAGATTTTACAGT                             |
| COSMC 3' arm_fwd        | USER PCR primer for COSMC donor plasmid (Homology arm) | AGGTCTGAGUGATTGTCTTAAGCATAGAGTC                            |
| COSMC 3' arm_rev        | USER PCR primer for COSMC donor plasmid (Homology arm) | AGCGACGUCCTCATTTGCATATATTTGAA                              |
| Mgat1 5' arm_fwd - set1 | USER PCR primer for Mgat1 donor plasmid (Homology arm) | AGTCGGTGUTTGCAGCAAATCAGGGAGCAT                             |
| Mgat1 5' arm_rev - set1 | USER PCR primer for Mgat1 donor plasmid (Homology arm) | ACGCTGCTUTCATCGTTCTTGAATTTCTG                              |
| Mgat1 3' arm_fwd - set1 | USER PCR primer for Mgat1 donor plasmid (Homology arm) | AGGTCTGAGUCATGGCAGTTCTTTGATCAGC                            |
| Mgat1 3' arm_rev - set1 | USER PCR primer for Mgat1 donor plasmid (Homology arm) | AGCGACGUAGGAGCCAGGTTAGGGTCAAC                              |
| Mgat1 5' arm_fwd - set2 | USER PCR primer for Mgat1 donor plasmid (Homology arm) | AGTCGGTGUTCACTGTGTTTCTTACTAAGT                             |
| Mgat1 5' arm_rev - set2 | USER PCR primer for Mgat1 donor plasmid (Homology arm) | ACGCTGCTUCTCAGCGTCTCAGCCAGG                                |
| Mgat1 3' arm_fwd - set2 | USER PCR primer for Mgat1 donor plasmid (Homology arm) | AGGTCTGAGUGCTGTTGCAGCAAATCAGGGAG                           |
| Mgat1 3' arm_rev - set2 | USER PCR primer for Mgat1 donor plasmid (Homology arm) | AGCGACGUCCCTTACGGCCAAAGGTCATCG                             |
| LdhA 5' arm_fwd         | USER PCR primer for LdhA donor plasmid (Homology arm)  | AGTCGGTGUTTCAATTAATCTTGATGCTAGTG                           |
| LdhA 5' arm_rev         | USER PCR primer for LdhA donor plasmid (Homology arm)  | ACGCTGCTUTCTGGATTCAAGATTCTCAGGG                            |
| LdhA 3' arm_fwd         | USER PCR primer for LdhA donor plasmid (Homology arm)  | AGGTCTGAGUAGCAGTGGAATGAGGTTCAAA                            |
| LdhA 3' arm_rev         | USER PCR primer for LdhA donor plasmid (Homology arm)  | AGCGACGUAGCCAGGGCCACAGAGAAAAC                              |
| EF-1a_fwd               | USER PCR primer for donor plasmid (EF-1a)              | AAGCAGCGUGTGAGGCTCCGGTGCCC                                 |
| EF-1a_rev               | USER PCR primer for donor plasmid (EF-1a)              | ATGACGTCUTCACGACACCTGAAATGGAA                              |
| kozak_mcherry_fwd       | USER PCR primer for donor plasmid (mCherry-BGH pA)     | AGACGTCAUCGCCACCATGGTGAGCAAGG                              |
| BGH pA_rev              | USER PCR primer for donor plasmid (mCherry-BGH pA)     | ATCGCACUCCATAGAGCCCACCGCATCC                               |
| Marker NeoR_fwd         | USER PCR primer for donor plasmid (NeoR)               | AGTGCGAUCTGTGGAATGTGTGTCAGTT                               |
| Marker NeoR_rev         | USER PCR primer for donor plasmid (NeoR)               | ACTCAGACCUCAGACATGATAAGATACATTG                            |
| CMV_fwd                 | USER PCR primer for donor plasmid (ZsGreen1)           | ACGTCGUGTTGACATTGATTATTGACT                                |

## Supplementary Information

## Targeted DNA integration platform in CHO cells

|                                           |                                                 |                                                              |
|-------------------------------------------|-------------------------------------------------|--------------------------------------------------------------|
| BGH pA_rev2                               | USER PCR primer for donor plasmid (ZsGreen1)    | ACGCAAGUCCATAGAGCCCACCGCATCC                                 |
| pJ204 backbone_fwd                        | USER PCR primer for donor plasmid (Backbone)    | ACTTGCGUAGTGAGTCGAATAAGGGCGACACA<br>AA                       |
| pJ204 backbone_rev                        | USER PCR primer for donor plasmid (Backbone)    | ACACCGACUGAGTCGAATAAGGGCGACACCCC<br>A                        |
| <b>5'/3' Junction PCR and Out-Out PCR</b> |                                                 |                                                              |
| COSMC genomic fwd [junction]              | COSMC amplicon for 5' junction PCR              | TGTTTCTAGGCTAATGCTTTGA                                       |
| COSMC genomic rev [junction]              | COSMC amplicon for 3' junction PCR              | CCTGCCCCACAGAAAAGTA                                          |
| Mgat1 genomic fwd [junction] – set1       | Mgat1 amplicon for 5' junction PCR              | TAGACTGGGGAAGTGAGC                                           |
| Mgat1 genomic rev [junction] – set1       | Mgat1 amplicon for 3' junction PCR              | CAATAAAAGACGTCAGGAGGC                                        |
| Mgat1 genomic fwd [junction] – set2       | Mgat1 amplicon for 5' junction PCR              | TCTGCTGTCTCTACTGCCCT                                         |
| Mgat1 genomic rev [junction] – set2       | Mgat1 amplicon for 3' junction PCR              | CTATAGACACGGGCAAGGAA                                         |
| LdhA genomic fwd [junction]               | LdhA amplicon for 5' junction PCR               | GGCTGCTGTTTCAGAGGTCTT                                        |
| LdhA genomic rev [junction]               | LdhA amplicon for 3' junction PCR               | TGAGGCTTACACACAGCACA                                         |
| EF-1a rev [junction]                      | Amplicon for 5' junction PCR                    | ATCCTGGCCCGCATTACAA                                          |
| NeoR fwd [junction]                       | Amplicon for 3' junction PCR                    | CTGGACGAAGAGCATCAGGG                                         |
| <b>Deep sequencing</b>                    |                                                 |                                                              |
| COSMC sgRNA2_F_Nex                        | COSMC amplicon for MiSeq analysis (sgRNA2 site) | TCGTGGCAGCGTCAGATGTGTATAAGAGACA<br>GTCCACCTTGTTCAGGACT       |
| COSMC sgRNA2_R_Nex                        | COSMC amplicon for MiSeq analysis (sgRNA2 site) | GTCTCGTGGGCTCGGAGATGTGTATAAGAGAC<br>AGGGATCCATCGCAGCCTTCTAT  |
| Mgat1 sgRNA1_F_Nex                        | Mgat1 amplicon for MiSeq analysis (sgRNA1 site) | TCGTGGCAGCGTCAGATGTGTATAAGAGACA<br>GCCAAGGCCTTCTGGGATGAC     |
| Mgat1 sgRNA1_R_Nex                        | Mgat1 amplicon for MiSeq analysis (sgRNA1 site) | GTCTCGTGGGCTCGGAGATGTGTATAAGAGAC<br>AGCGAACTGCTGGTTCAGCTTG   |
| Mgat1 sgRNA2_F_Nex                        | Mgat1 amplicon for MiSeq analysis (sgRNA2 site) | TCGTGGCAGCGTCAGATGTGTATAAGAGACA<br>GGCGGTACAGTACACTAGCAGA    |
| Mgat1 sgRNA2_R_Nex                        | Mgat1 amplicon for MiSeq analysis (sgRNA2 site) | GTCTCGTGGGCTCGGAGATGTGTATAAGAGAC<br>AGAAGGCAGGTGCTGCTAATTCCA |
| Mgat1 sgRNA3_F_Nex                        | Mgat1 amplicon for MiSeq analysis (sgRNA3 site) | TCGTGGCAGCGTCAGATGTGTATAAGAGACA<br>GTGCAGCAAATCAGGGAGCAT     |
| Mgat1 sgRNA3_R_Nex                        | Mgat1 amplicon for MiSeq analysis (sgRNA3 site) | GTCTCGTGGGCTCGGAGATGTGTATAAGAGAC<br>AGGAGGGCCGATAGTGCAACAA   |
| Mgat1 sgRNA4_F_Nex                        | Mgat1 amplicon for MiSeq analysis (sgRNA4 site) | TCGTGGCAGCGTCAGATGTGTATAAGAGACA<br>GCCCCATCATTGTCAGCCGTC     |
| Mgat1 sgRNA4_R_Nex                        | Mgat1 amplicon for MiSeq analysis (sgRNA4 site) | GTCTCGTGGGCTCGGAGATGTGTATAAGAGAC<br>AGGAACTTGTGAAGATCTGCCCC  |
| Mgat1 sgRNA5_F_Nex                        | Mgat1 amplicon for MiSeq analysis (sgRNA5 site) | TCGTGGCAGCGTCAGATGTGTATAAGAGACA<br>GTTCTGGACACGCCACGC        |
| Mgat1 sgRNA5_R_Nex                        | Mgat1 amplicon for MiSeq analysis (sgRNA5 site) | GTCTCGTGGGCTCGGAGATGTGTATAAGAGAC<br>AGGCCACGGTGGGCACTTT      |
| LdhA sgRNA1_F_Nex                         | LdhA amplicon for MiSeq analysis (sgRNA1 site)  | TCGTGGCAGCGTCAGATGTGTATAAGAGACA<br>GAAGTCCAAGATGGCAACACTCAA  |
| LdhA sgRNA1_R_Nex                         | LdhA amplicon for MiSeq analysis (sgRNA1 site)  | GTCTCGTGGGCTCGGAGATGTGTATAAGAGAC<br>AGCTCCAATGCTTGGGCTTGTG   |
| LdhA sgRNA2_F_Nex                         | LdhA amplicon for MiSeq analysis (sgRNA2 site)  | TCGTGGCAGCGTCAGATGTGTATAAGAGACA<br>GGTGCTCTCCTGTGGAAACATTG   |

## Supplementary Information

## Targeted DNA integration platform in CHO cells

|                     |                                                              |                                                                 |
|---------------------|--------------------------------------------------------------|-----------------------------------------------------------------|
| LdhA sgRNA2_R_Nex   | LdhA amplicon for MiSeq analysis (sgRNA2 site)               | GTCTCGTGGGCTCGGAGATGTGTATAAGAGAC<br>AGAGTTTCCATGCTGCCAATCACG    |
| LdhA sgRNA3_F_Nex   | LdhA amplicon for MiSeq analysis (sgRNA3 site)               | TCGTCCGCGAGCGTCAGATGTGTATAAGAGACA<br>GACAGCAAACCTCCAAGCTGGT     |
| LdhA sgRNA3_R_Nex   | LdhA amplicon for MiSeq analysis (sgRNA3 site)               | GTCTCGTGGGCTCGGAGATGTGTATAAGAGAC<br>AGCCAAGCCACGTAGGTCAAGA      |
| LdhA sgRNA4_F_Nex   | LdhA amplicon for MiSeq analysis (sgRNA4 site)               | TCGTCCGCGAGCGTCAGATGTGTATAAGAGACA<br>GCTTGACCTACGTGGCTTGGGA     |
| LdhA sgRNA4_R_Nex   | LdhA amplicon for MiSeq analysis (sgRNA4 site)               | GTCTCGTGGGCTCGGAGATGTGTATAAGAGAC<br>AGTGATACTAAAGACTTACCACTGGAG |
| LdhA sgRNA5_F_Nex   | LdhA amplicon for MiSeq analysis (sgRNA5 site)               | TCGTCCGCGAGCGTCAGATGTGTATAAGAGACA<br>GTCTGCTCGATTCCGTTATCTGAT   |
| LdhA sgRNA5_R_Nex   | LdhA amplicon for MiSeq analysis (sgRNA5 site)               | GTCTCGTGGGCTCGGAGATGTGTATAAGAGAC<br>AGGTTCTTAACAGAGCCATCTTTCT   |
| COSMC OT1_F_Nex     | COSMC amplicon for MiSeq analysis (sgRNA2 site: off-target1) | TCGTCCGCGAGCGTCAGATGTGTATAAGAGACA<br>GGTGTTCACAGCTGGGGCAT       |
| COSMC OT1_R_Nex     | COSMC amplicon for MiSeq analysis (sgRNA2 site: off-target1) | GTCTCGTGGGCTCGGAGATGTGTATAAGAGAC<br>AGGAAAGGGCAGGGGACTGAAA      |
| COSMC OT2_F_Nex     | COSMC amplicon for MiSeq analysis (sgRNA2 site: off-target2) | TCGTCCGCGAGCGTCAGATGTGTATAAGAGACA<br>GAGAGGGAGGGGATGCTAAGT      |
| COSMC OT2_R_Nex     | COSMC amplicon for MiSeq analysis (sgRNA2 site: off-target2) | GTCTCGTGGGCTCGGAGATGTGTATAAGAGAC<br>AGCCTTGGGTGTAAGGCCCAT       |
| COSMC OT3_F_Nex     | COSMC amplicon for MiSeq analysis (sgRNA2 site: off-target3) | TCGTCCGCGAGCGTCAGATGTGTATAAGAGACA<br>GATTCAGGCCTGTTTGAGCCA      |
| COSMC OT3_R_Nex     | COSMC amplicon for MiSeq analysis (sgRNA2 site: off-target3) | GTCTCGTGGGCTCGGAGATGTGTATAAGAGAC<br>AGGGTAAAGGAGACCGCATGT       |
| COSMC OT4_F_Nex     | COSMC amplicon for MiSeq analysis (sgRNA2 site: off-target4) | TCGTCCGCGAGCGTCAGATGTGTATAAGAGACA<br>GAGACATTGTCCACCCACAGC      |
| COSMC OT4_R_Nex     | COSMC amplicon for MiSeq analysis (sgRNA2 site: off-target4) | GTCTCGTGGGCTCGGAGATGTGTATAAGAGAC<br>AGGTGAGTGGAGGGTCTGGGAT      |
| COSMC OT5_F_Nex     | COSMC amplicon for MiSeq analysis (sgRNA2 site: off-target5) | TCGTCCGCGAGCGTCAGATGTGTATAAGAGACA<br>GGGAAAATACTACGTTATCCTTTGCT |
| COSMC OT5_R_Nex     | COSMC amplicon for MiSeq analysis (sgRNA2 site: off-target5) | GTCTCGTGGGCTCGGAGATGTGTATAAGAGAC<br>AGCGTGGAGGAATAGCCTCTGT      |
| Mgat1_sg1-OT1_F_Nex | Mgat1 amplicon for MiSeq analysis (sgRNA1 site: off-target1) | TCGTCCGCGAGCGTCAGATGTGTATAAGAGACA<br>GTGGTGTAGATTGTCCCACACC     |
| Mgat1_sg1-OT1_R_Nex | Mgat1 amplicon for MiSeq analysis (sgRNA1 site: off-target1) | GTCTCGTGGGCTCGGAGATGTGTATAAGAGAC<br>AGAAGACCTTTGGCTGGGATGTA     |
| Mgat1_sg1-OT2_F_Nex | Mgat1 amplicon for MiSeq analysis (sgRNA1 site: off-target2) | TCGTCCGCGAGCGTCAGATGTGTATAAGAGACA<br>GGAAGCCATTGAGCTGCAAGTT     |
| Mgat1_sg1-OT2_R_Nex | Mgat1 amplicon for MiSeq analysis (sgRNA1 site: off-target2) | GTCTCGTGGGCTCGGAGATGTGTATAAGAGAC<br>AGGCACTGAATGGGAAAAGGGG      |
| Mgat1_sg5-OT1_F_Nex | Mgat1 amplicon for MiSeq analysis (sgRNA5 site: off-target1) | TCGTCCGCGAGCGTCAGATGTGTATAAGAGACA<br>GTGCGTGCAGCGTCTCT          |
| Mgat1_sg5-OT1_R_Nex | Mgat1 amplicon for MiSeq analysis (sgRNA5 site: off-target1) | GTCTCGTGGGCTCGGAGATGTGTATAAGAGAC<br>AGCGGAGGGTGGCCTGCT          |
| Mgat1_sg5-OT2_F_Nex | Mgat1 amplicon for MiSeq analysis (sgRNA5 site: off-target2) | TCGTCCGCGAGCGTCAGATGTGTATAAGAGACA<br>GCTAAGGAAGAGCGTCAGATGGT    |
| Mgat1_sg5-OT2_R_Nex | Mgat1 amplicon for MiSeq analysis (sgRNA5 site: off-target2) | GTCTCGTGGGCTCGGAGATGTGTATAAGAGAC<br>AGCGCCCTCGACTTTGACAGGA      |
| Mgat1_sg5-OT3_F_Nex | Mgat1 amplicon for MiSeq analysis (sgRNA5 site: off-target3) | TCGTCCGCGAGCGTCAGATGTGTATAAGAGACA<br>GTGTACAACATGACTAATGGCAGC   |
| Mgat1_sg5-OT3_R_Nex | Mgat1 amplicon for MiSeq analysis (sgRNA5 site: off-target3) | GTCTCGTGGGCTCGGAGATGTGTATAAGAGAC<br>AGCCTACCCCAACCCCGTG         |
| Mgat1_sg5-OT4_F_Nex | Mgat1 amplicon for MiSeq analysis (sgRNA5 site: off-target4) | TCGTCCGCGAGCGTCAGATGTGTATAAGAGACA<br>GTTTCATGGGCTCATCCCTA       |

Supplementary Information Targeted DNA integration platform in CHO cells

|                              |                                                                     |                                                              |
|------------------------------|---------------------------------------------------------------------|--------------------------------------------------------------|
| Mgat1_sg5-OT4_R_Nex          | Mgat1 amplicon for MiSeq analysis<br>(sgRNA5 site: off-target4)     | GTCTCGTGGGCTCGGAGATGTGTATAAGAGAC<br>AGGGGCACATTGGA CT CAGACA |
| <b>qRT-PCR</b>               |                                                                     |                                                              |
| EF-1a - mCherry junction fwd | mCherry amplicon for qRT-PCR<br>[Amplicon size: 100 bp]             | CCTCAGACAGTGGTTCAAAGT                                        |
| EF-1a - mCherry junction rev | mCherry amplicon for qRT-PCR<br>[Amplicon size: 100 bp]             | GATGGCCATGTTATCCTCCTC                                        |
| COSMC fwd                    | COSMC amplicon for qRT-PCR<br>[Amplicon size: 144 bp]               | GCAGCCTTTCTATCTAGGACAC                                       |
| COSMC rev                    | COSMC amplicon for qRT-PCR<br>[Amplicon size: 144 bp]               | CCACCTTGTT CAGGACTT                                          |
| LdhA fwd                     | LdhA amplicon for qRT-PCR<br>[Amplicon size: 94 bp]                 | GAGTGAATGTAGCTGGTGTCTC                                       |
| LdhA rev                     | LdhA amplicon for qRT-PCR<br>[Amplicon size: 94 bp]                 | ACCTGCTTGTGAACCTCATT                                         |
| Mgat1-sg1 fwd                | Mgat1 amplicon for qRT-PCR<br>(sgRNA1 site) [Amplicon size: 113 bp] | GGCCTGTATTCGTCCAGAAA                                         |
| Mgat1-sg1 rev                | Mgat1 amplicon for qRT-PCR<br>(sgRNA1 site) [Amplicon size: 113 bp] | CGAACTGCTGGTTCAGCTTG                                         |
| Mgat1-sg5 fwd                | Mgat1 amplicon for qRT-PCR<br>(sgRNA5 site) [Amplicon size: 128 bp] | CTCACCCGTGAGGTGTT C                                          |
| Mgat1-sg5 rev                | Mgat1 amplicon for qRT-PCR<br>(sgRNA5 site) [Amplicon size: 128 bp] | GCCACGGTGGGCAC TTT                                           |
| Vinculin fwd                 | Vinculin amplicon for qRT-PCR<br>[Amplicon size: 73 bp]             | GCTGGTTGCTAAGAGGGAGG                                         |
| Vinculin rev                 | Vinculin amplicon for qRT-PCR<br>[Amplicon size: 73 bp]             | ATCAGAGGCAGCTTTACGG                                          |
| Beta-actin fwd               | Beta-actin amplicon for qRT-PCR<br>[Amplicon size: 202 bp]          | TTTCCAGCCTTCCTTCTGGGTGA                                      |
| Beta-actin rev               | Beta-actin amplicon for qRT-PCR<br>[Amplicon size: 202 bp]          | TGGCATAGAGGTCTTTGCGGATGT                                     |

**Supplementary Table 3.** Plasmids used in this study as PCR templates

| Plasmid name | Elements                            | Source            |
|--------------|-------------------------------------|-------------------|
| pBudCE4.1    | EF-1a                               | Life Technologies |
| pmCherry-N1  | mCherry                             | Clontech          |
| pcDNA3.1(+)  | pCMV, BGH pA, pSV40- NeoR – SV40 pA | Life Technologies |
| pZsGreen1-DR | ZsGreen1-DR                         | Clontech          |
| pU0020       | AmpR, pUC19 replication origin      | Lund et al., 2014 |
